# Supplementary material for: Selective Inhibition of Histone Deacetylation in Melanoma Increases Targeted Gene Delivery by a Bacteriophage Viral Vector
Source: MDPI journal article supplement (doi:10.3390/cancers10040125), 2018-04-21
Supplement: s1 [file s1]

# Supplementary Materials: Selective Inhibition of Histone Deacetylation in Melanoma Increases Targeted Gene Delivery by a Bacteriophage Viral Vector

Samuel Campbell, Keittisak Suwan, Sajee Waramit, Eric Ofori Aboagye and Amin Hajitou

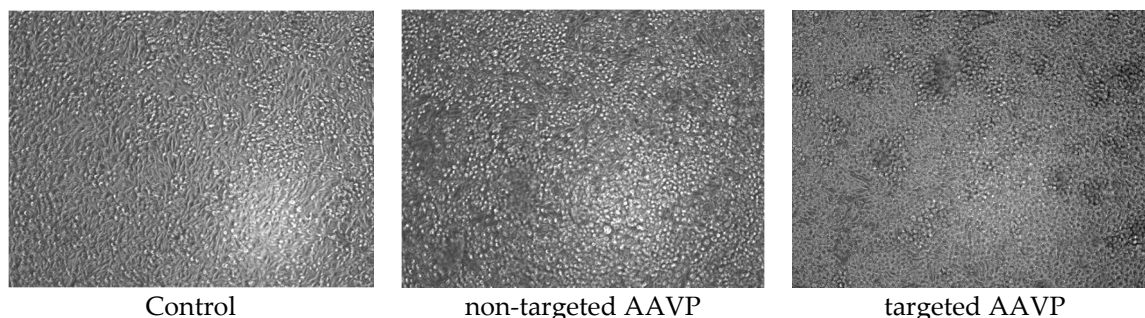

**Figure S1.** Phase contrast images of M21 cells taken at day 6 post vector transduction with targeted AAVP or non-targeted vector. Untreated cells were used as control. Images are shown at 100x magnification.

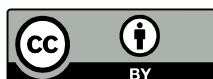

© 2018 by the authors. Licensee MDPI, Basel, Switzerland. This article is an open access article distributed under the terms and conditions of the Creative Commons Attribution (CC BY) license (<http://creativecommons.org/licenses/by/4.0/>).
